# Supplementary material
Source: PubMed Central journal article supplement (PMC5263185)
Supplement: NIHMS835413-supplement-1.pdf [file NIHMS835413-supplement-1.pdf]

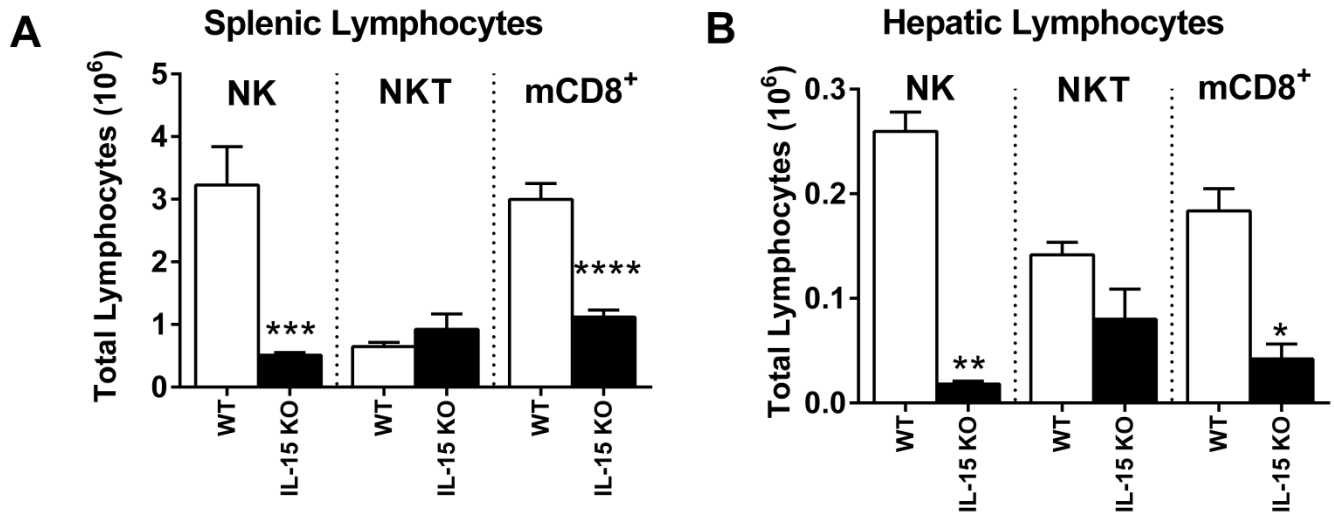

**Supplemental Figure 1. NK, NKT and memory CD8<sup>+</sup> T cell counts in spleens and livers of wild type and IL-15 KO mice.** Spleens (A) and livers (B) were harvested from wild type and IL-15 KO mice for measurement of NK, NKT and memory CD8<sup>+</sup> T cell number. \*  $p < 0.05$ , \*\*  $p < 0.01$ , \*\*\*  $p < 0.001$ , \*\*\*\*  $p < 0.0001$ , compared to wild type mice.  $n=3-9$  mice per group. Data are representative of two separate experiments.

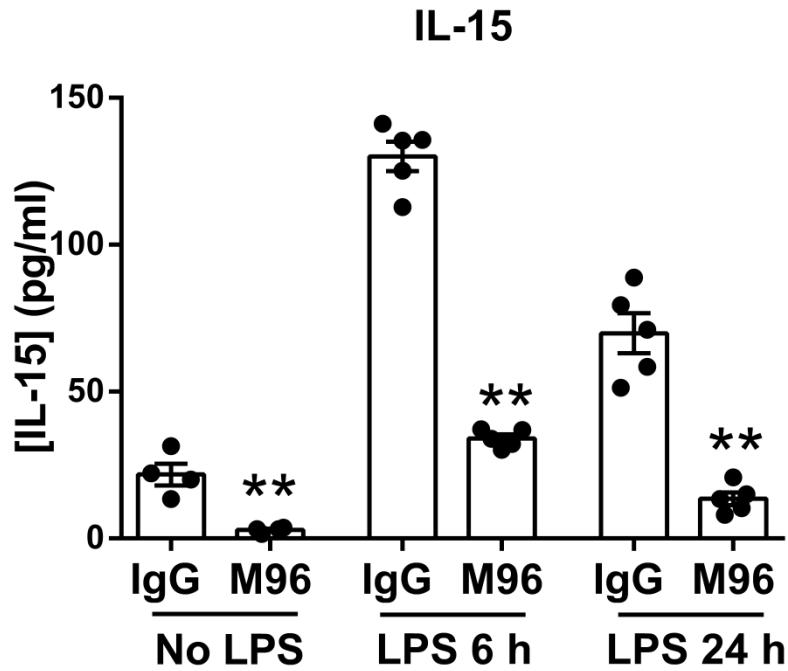

**Supplemental Figure 2. Plasma level of IL-15 in wild type mice treated with IgG or M96, an IL-15 neutralizing antibody post LPS.** Wild type mice received 20  $\mu$ g of M96 or IgG i.p. at 2 hours prior to CLP or LPS challenge. Blood was harvested at 0, 6 and 24 hours after LPS for measurement of IL-15 in the plasma. \*\*  $p < 0.01$  compared to IgG control at designated time points.  $n=4-5$  mice per group. Data are representative of two separate experiments.

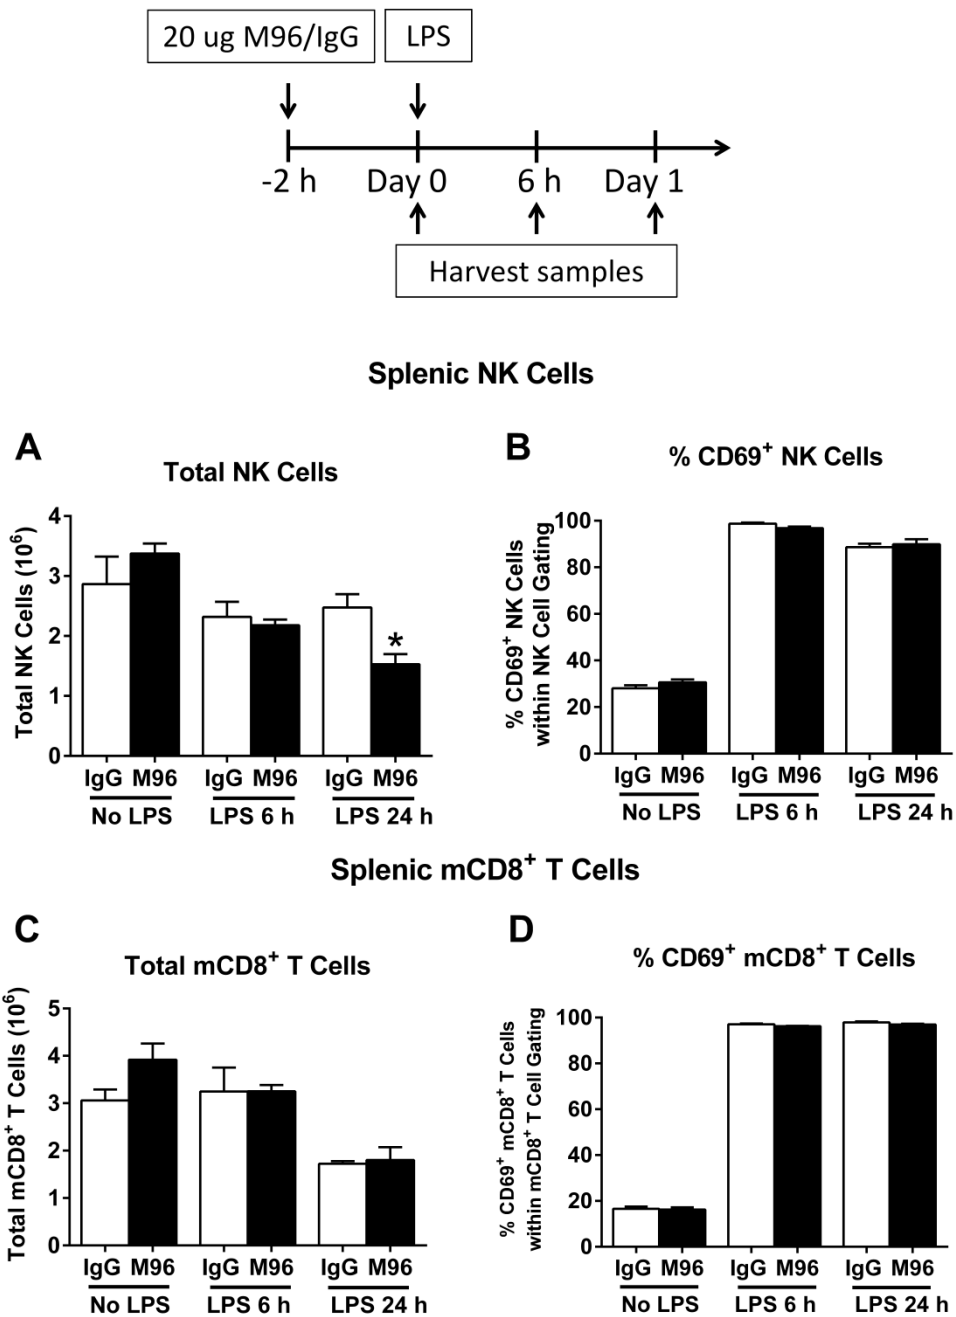

**Supplemental Figure 3. Effect of short-term IL-15 neutralization on lymphocyte numbers and activation after LPS challenge.** Wild type mice received 20  $\mu\text{g}$  of M96, an IL-15 neutralizing antibody i.p. at 2 hours prior to 150  $\mu\text{g}$  LPS challenge (A and B). Specific IgG serve as control. Splenic NK and mCD8<sup>+</sup> T cell number and activation were measured at 0, 6 and 24 hours after LPS challenge (A-D). \*  $p < 0.05$ , compared to IgG control.  $n=5-10$  mice per group. Data are representative of two separate experiments.

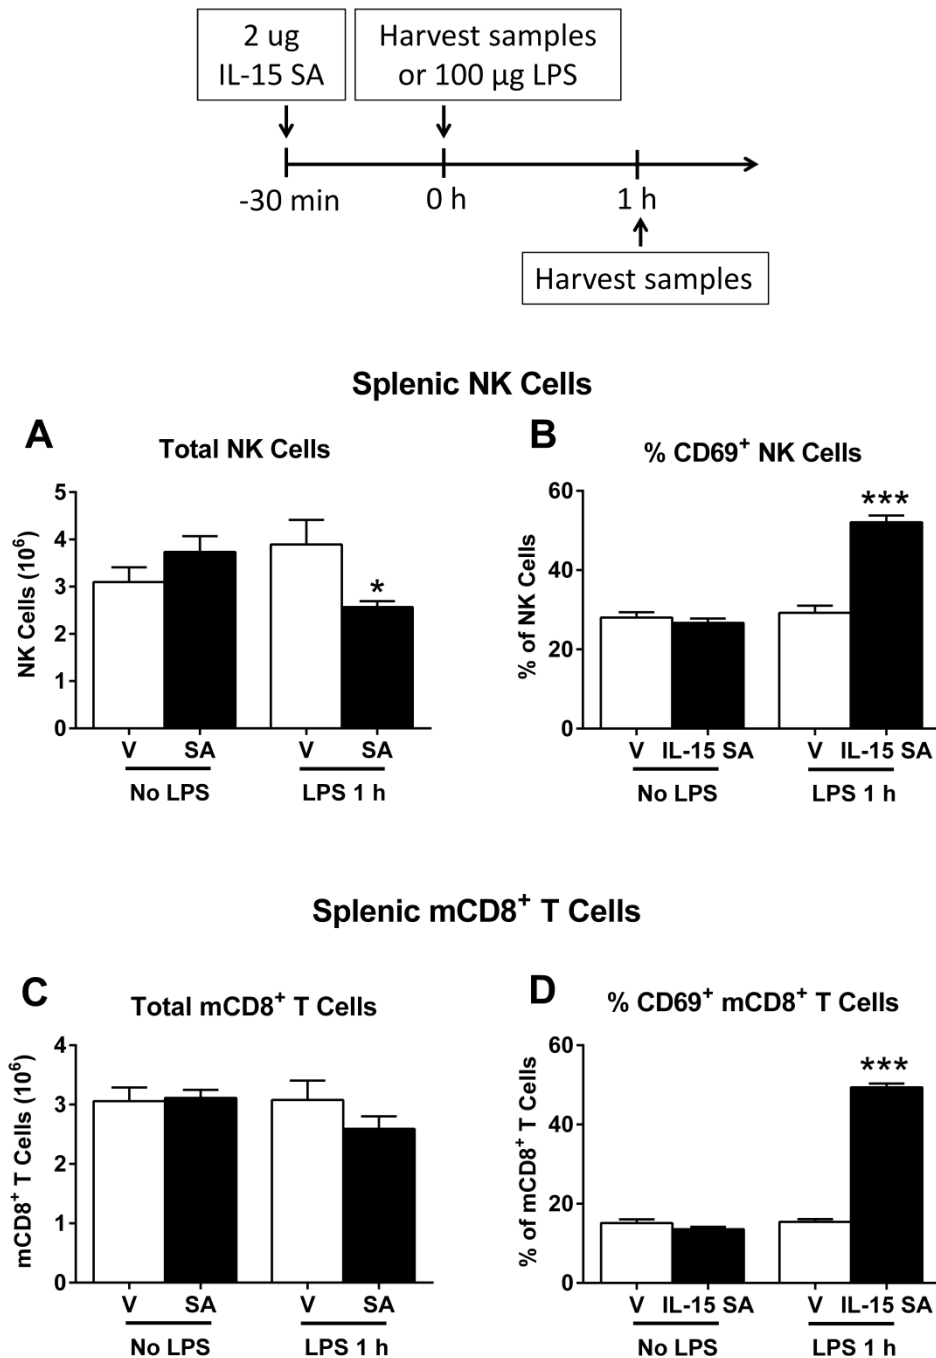

**Supplemental Figure 4. Effect of IL-15 SA on lymphocyte numbers and activation after LPS challenge.** Wild type mice were treated with 2  $\mu$ g of IL-15 SA 30 minutes prior to LPS (100  $\mu$ g) challenge. Spleens were harvested at 0 and 1 hours after LPS challenge for measurement of NK and mCD8<sup>+</sup> T cell total number and CD69 expression (A-D). \*  $p < 0.05$ , \*\*\*  $p < 0.001$ , compared to vehicle wild type control.  $n=4-8$  mice per group. Data are representative of two to three separate experiments.
